# Supplementary material for: Recurrent Implantation Failure: Bioinformatic Discovery of Biomarkers and Identification of Metabolic Subtypes
Source: MDPI journal article supplement (doi:10.3390/ijms241713488), 2023-08-30
Supplement: s1 [file s1]

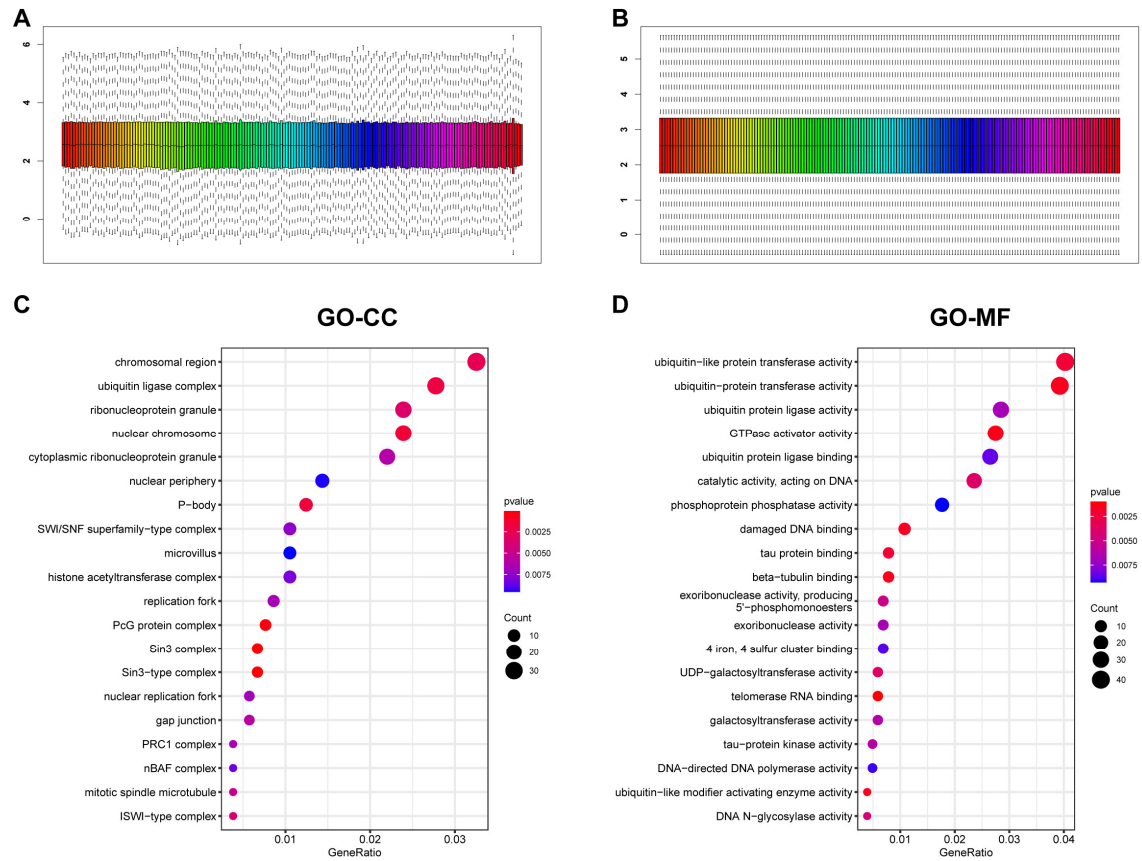

**Figure S1.** Data processing and analyses of functional enrichment of RIF-DEGs. Gene expression level statistics of the dataset before (A) and after (B) de-batching. The colors represent samples from three different datasets, respectively. (C-D) Main CCs, and MFs enriched by RIF-related DEGs. Each term's P value is colored according to the legend. Abbreviations: CC: cellular component, MF: molecular function, DEG: differentially expressed genes, RIF: recurrent implantation failure.

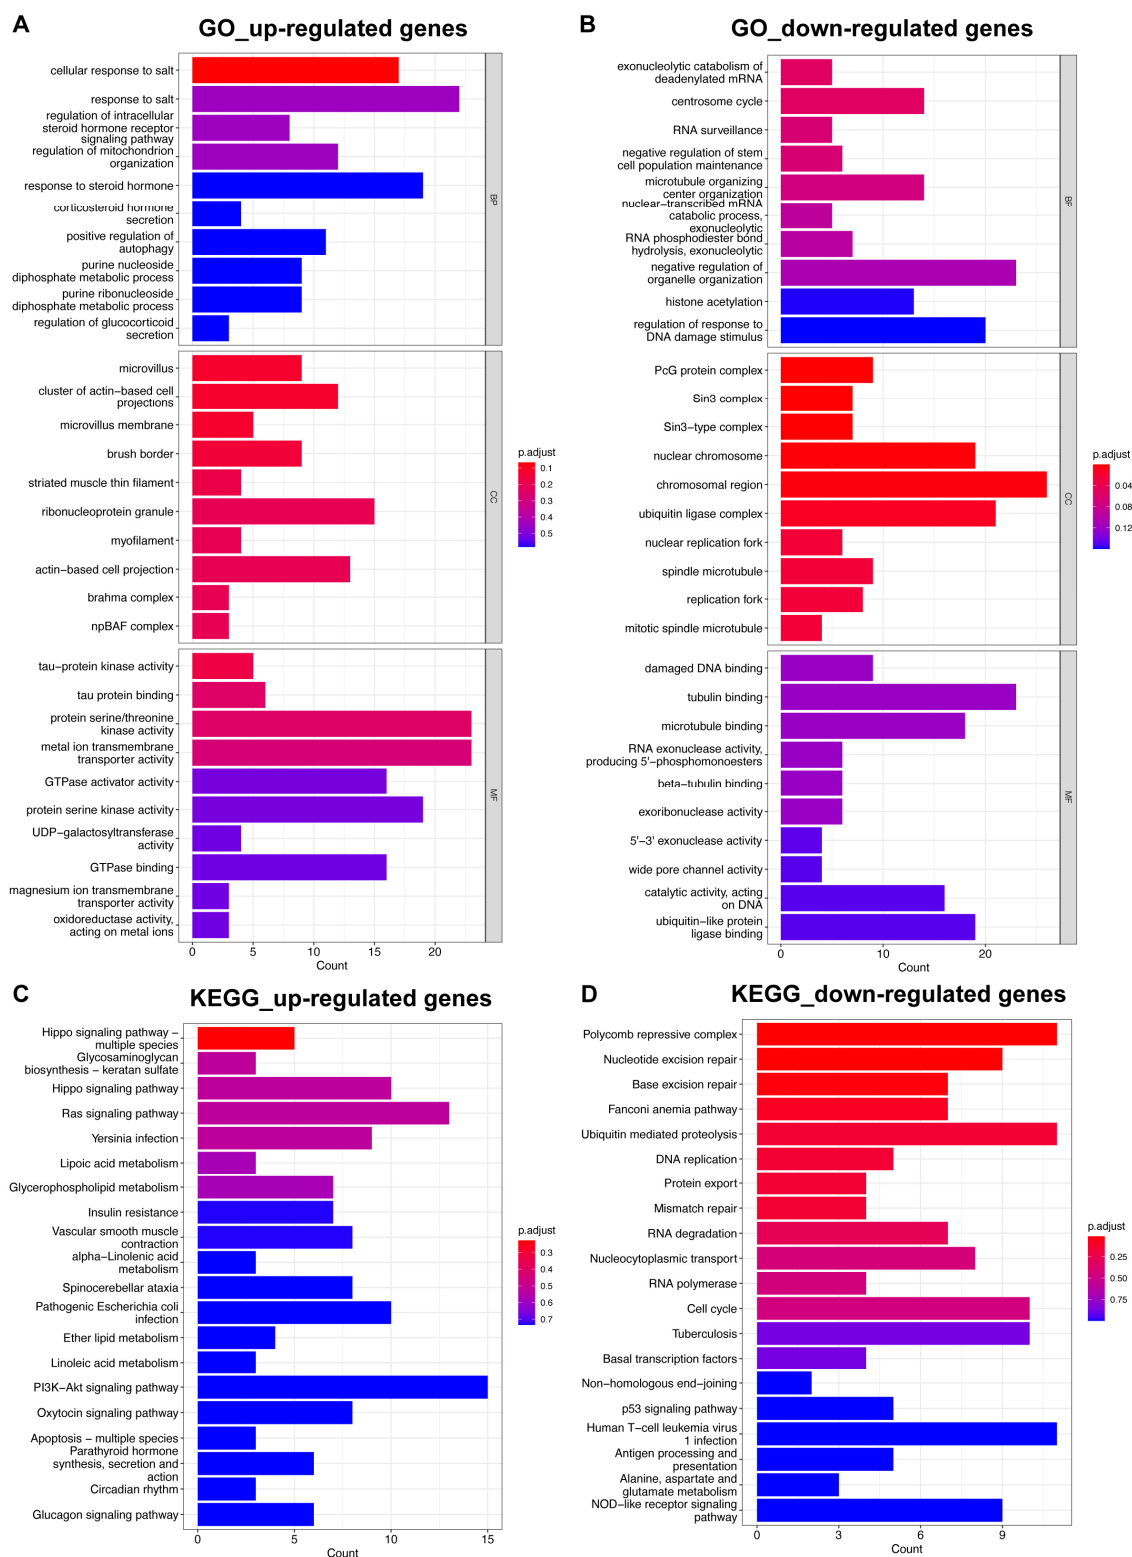

**Figure S2.** Functional enrichment analyses of separated upregulated and downregulated RIF-DEGs. GO enrichment analyses of (A) upregulated and (B) downregulated RIF-related DEGs. KEGG pathways enriched by (C) upregulated and (D) downregulated RIF-related DEGs. Each term's P value is colored according to the legend. Abbreviations: BP: biological process, CC: cellular component, DEG: differentially expressed genes, GO: Gene Ontology, MF: molecular function, KEGG: Kyoto Encyclopedia of Genes and Genomes, RIF: recurrent implantation failure.

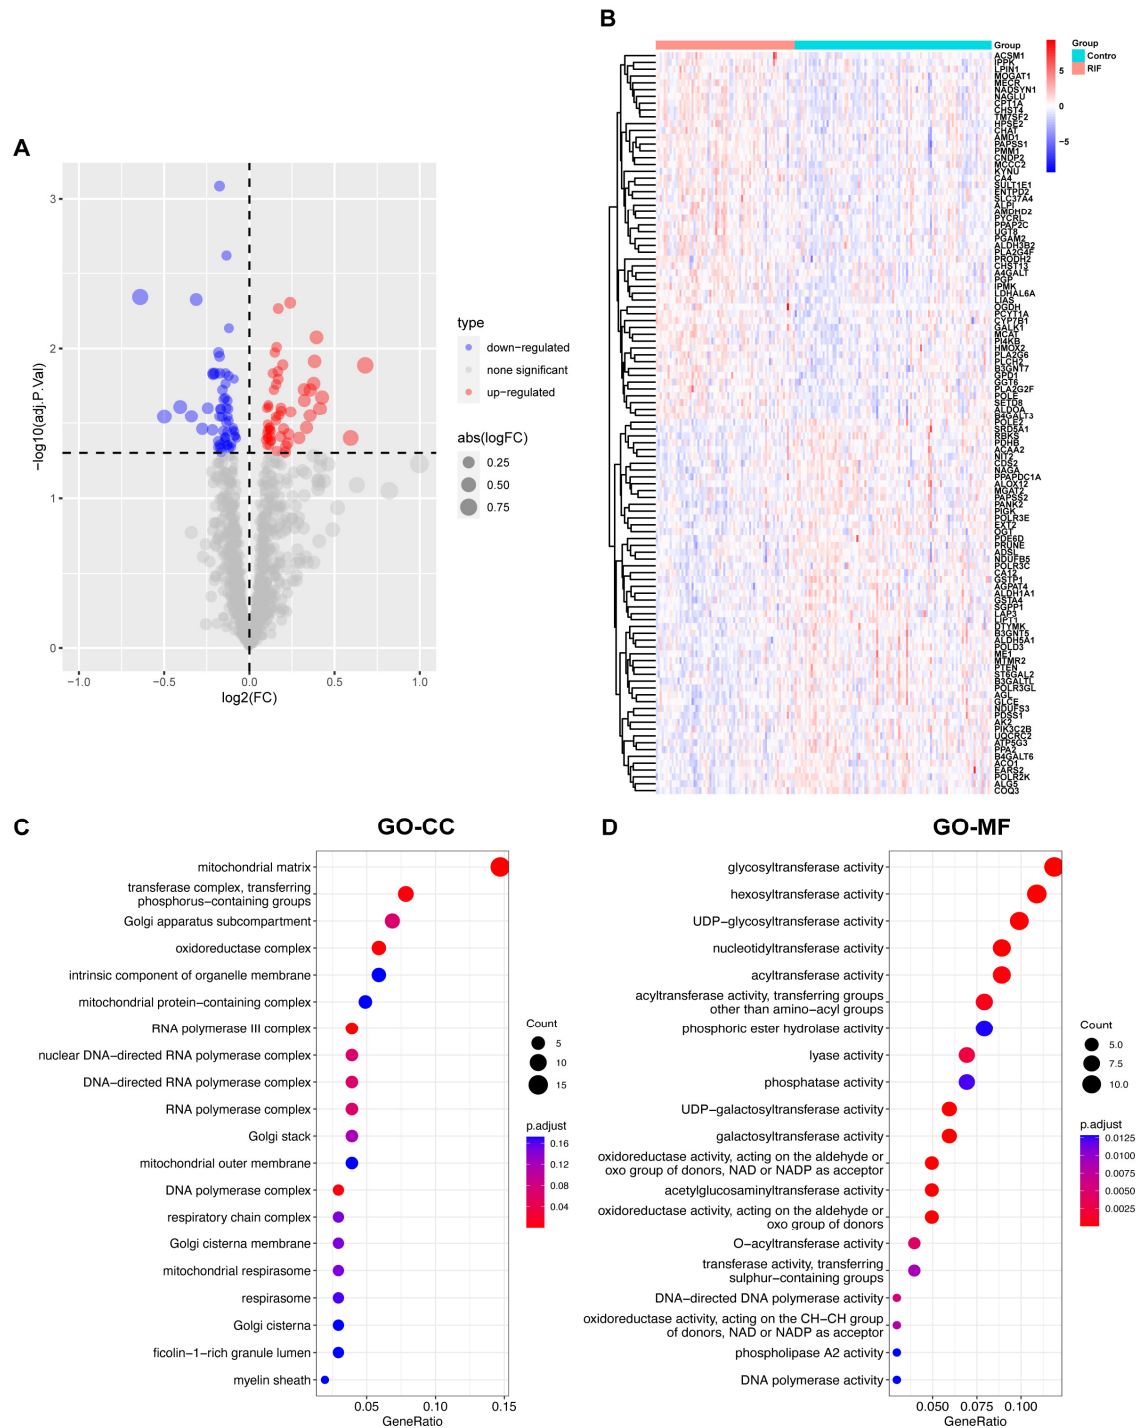

**Figure S3.** Metabolism-related DEGs and enriched items in CC and MF. (A) Metabolism-related DEGs volcano plot with log2FoldChange in the horizontal coordinate and  $-\log_{10}(\text{adjust P value})$  in the vertical coordinate. (B) Heatmap of metabolism-related DEG expression levels: red indicates high gene expression, and blue indicates low gene expression. Enriched items in (C) CC and (D) MF analysis. Each term's P value is colored according to the legend. Abbreviations: CC: cellular component, MF: molecular function, DEG: differentially expressed genes.

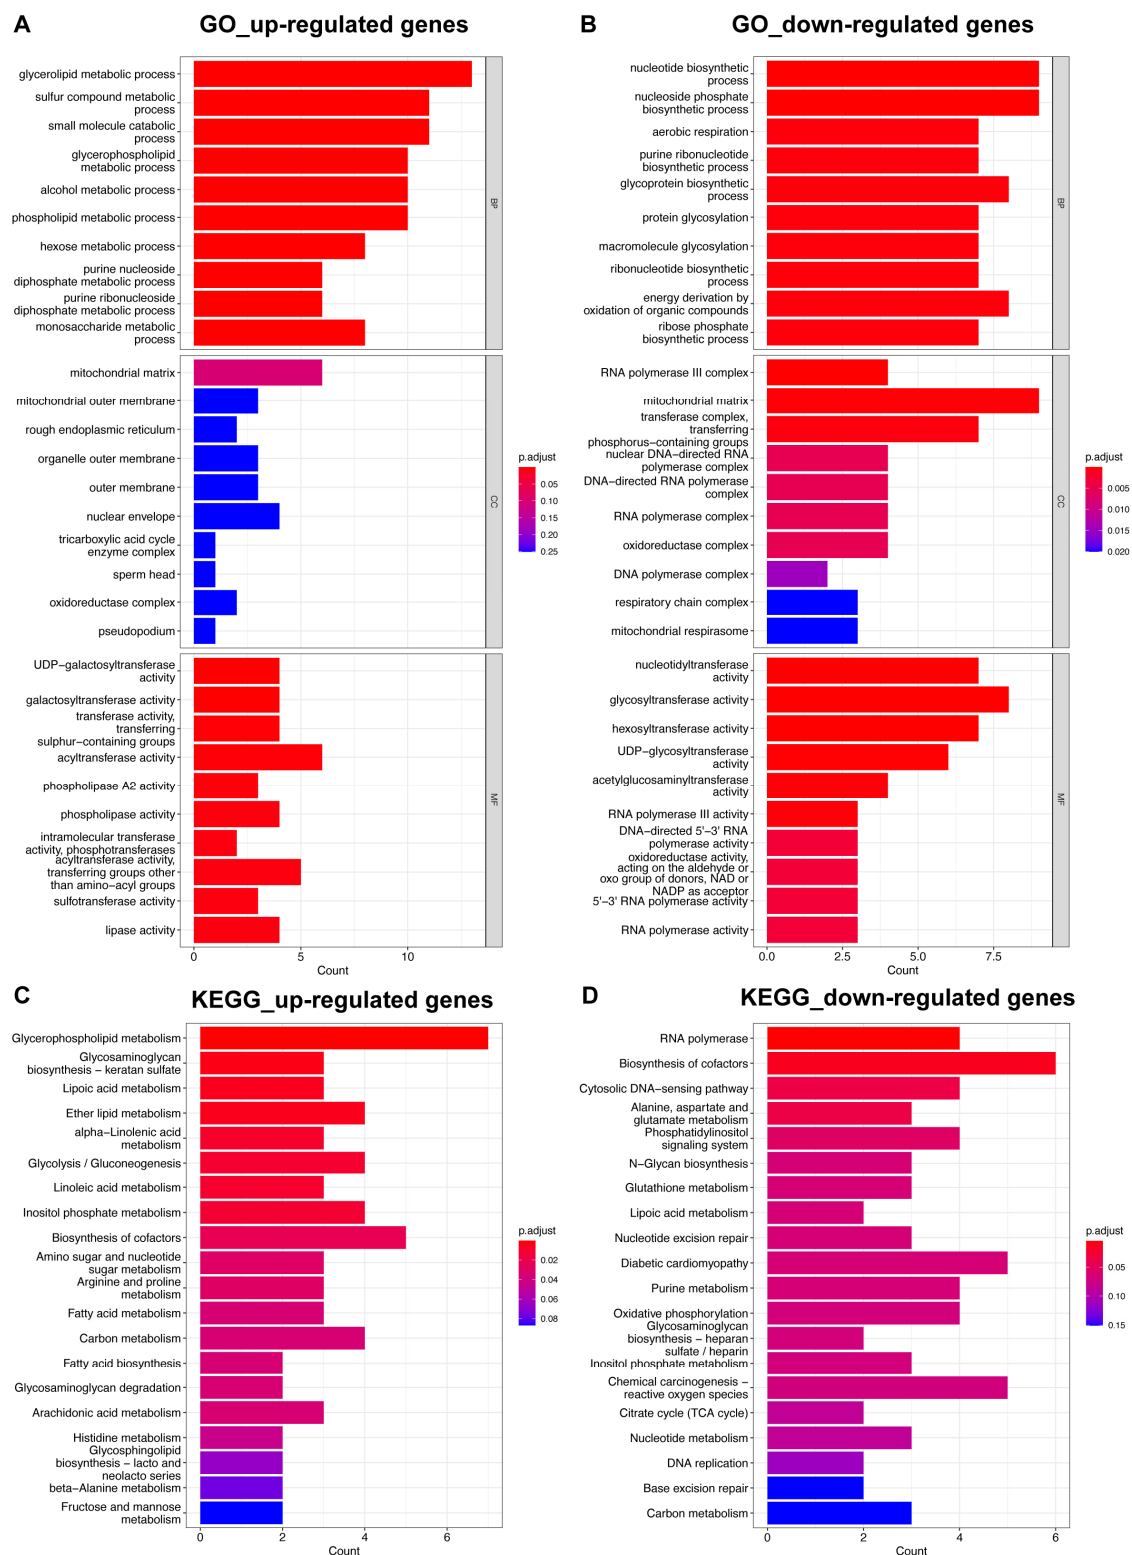

**Figure S4.** Functional enrichment analyses of separated upregulated and downregulated metabolism-related DEGs. GO enrichment analyses of (A) upregulated and (B) downregulated metabolism-related DEGs. KEGG pathways enriched by (C) upregulated and (D) downregulated metabolism-related DEGs. Each term's P value is colored according to the legend. Abbreviations: BP: biological process, CC: cellular component, DEG: differentially expressed genes, GO: Gene Ontology, MF: molecular function, KEGG: Kyoto Encyclopedia of Genes and Genomes, RIF: recurrent implantation failure.

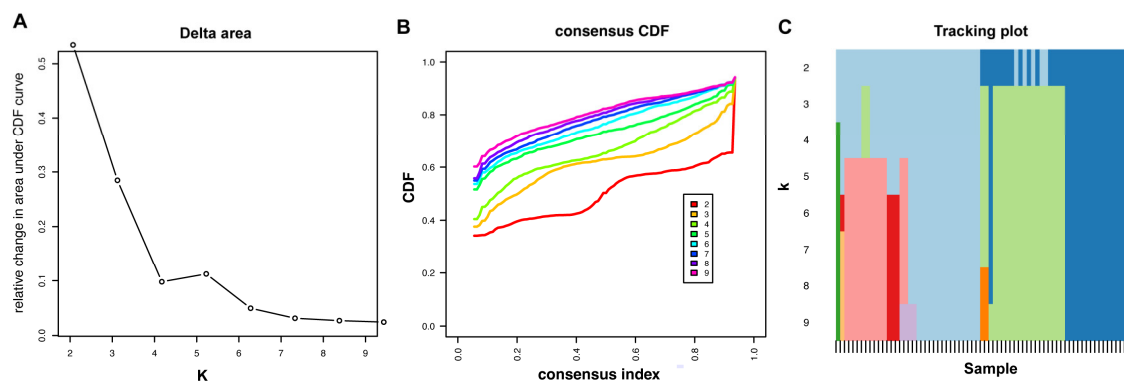

**Figure S5.** Two metabolic subtypes characterized by different metabolic features and molecular mechanisms. (A) Relative alterations in the area under CDF curve. (B) Consensus CDF when K = 2-9. (C) Tracking plot showing the sample classification when K = 2-9. Abbreviations: CDF: cumulative distribution function.

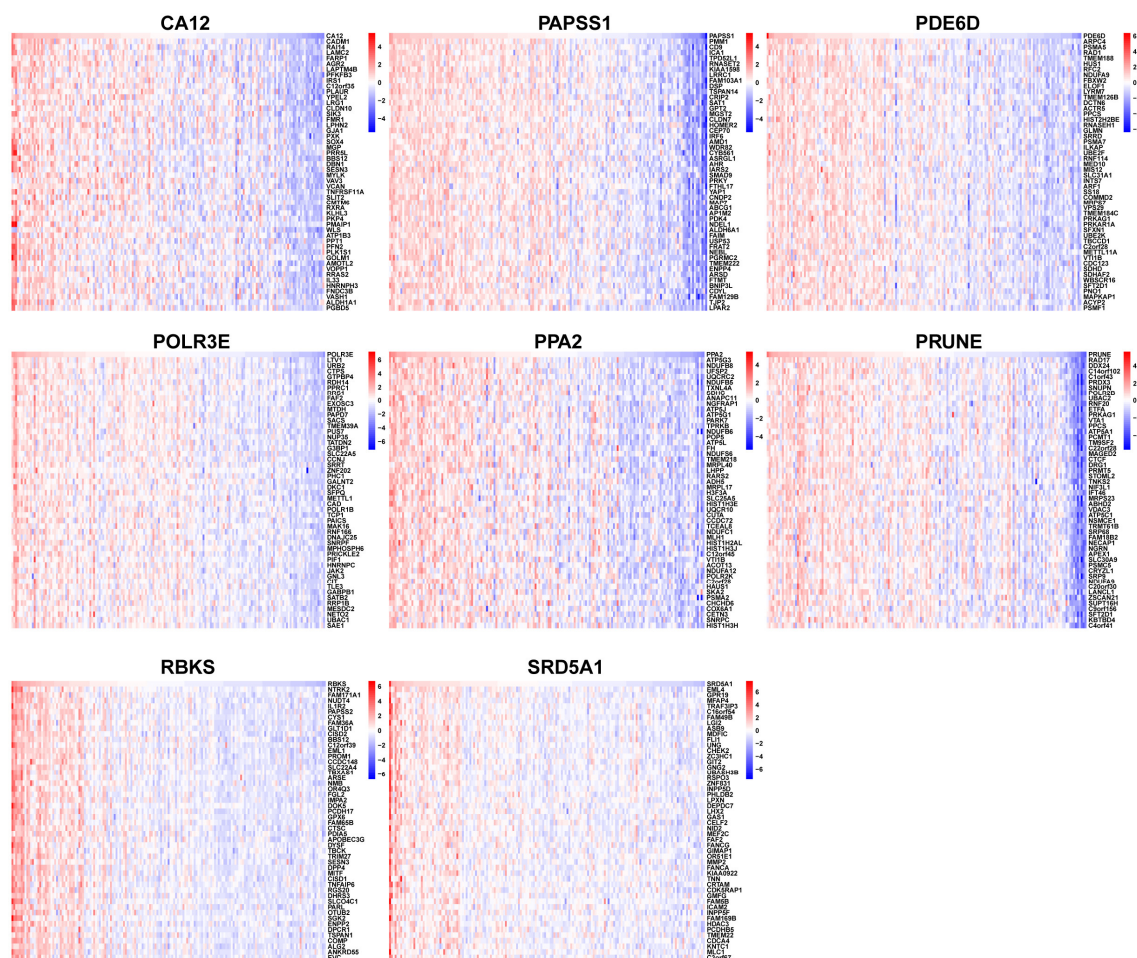

**Figure S6.** Correlation analysis between eight characteristic genes and all genes from three datasets. Heatmaps of the 50 genes with the strongest correlation.
